# Supplementary material
Source: publisher site journal article supplement (https://www.dovepress.com/article/373652)
Supplement: Supplementary file 1 [file get_supplementary_file.php]

Table S1. The peptides identified by HPLC-ESI-MS analysis

| Protein Group Accessions | Name  | Peptide sequence <sup>a</sup>                     | MH+[Da] <sup>b</sup> | Modifications  | q-Value <sup>c</sup> | PEP <sup>d</sup> | Xcorr <sup>e</sup> | Charge | m/z <sup>f</sup> [Da] | Replicate number <sup>g</sup> |
|--------------------------|-------|---------------------------------------------------|----------------------|----------------|----------------------|------------------|--------------------|--------|-----------------------|-------------------------------|
| AJF03209.1               | MPT32 | SKTTGDPPFPQG                                      | 1231.58878           |                | 0                    | 0.000031167      | 3.398998857        | 3      | 411.2011108           | Replicate 1,2,3               |
|                          |       | AARLGSDMGEF                                       | 1153.542             |                | 0                    | 0.0025983        | 4.699460387        | 3      | 385.1855164           | Replicate 1,2,3               |
|                          |       | AIAAMASASLVT                                      | 1147.60608           |                | 0                    | 0.0027918        | 3.255498201        | 3      | 383.2068787           | Replicate 1,2,3               |
|                          |       | ANGVSG                                            | 504.24319            |                | 0                    | 0.0092236        | 2.914167047        | 1      | 504.2431946           | Replicate 1,2,3               |
|                          |       | APPPADPNAPPPV                                     | 1336.69937           |                | 0                    | 0.00033705       | 3.09982755         | 3      | 446.2379761           | Replicate 1,2,3               |
|                          |       | AVPATANADPEPAPPV                                  | 1516.7609            |                | 0                    | 0.00035469       | 3.368763298        | 3      | 506.2584839           | Replicate 1,2,3               |
|                          |       | DAAH                                              | 413.18076            |                | 0                    | 0.0035361        | 2.6082654          | 1      | 413.1807556           | Replicate 1,3                 |
|                          |       | DANGVSGSASYEYVKFSDPSKPNGQIWTGVIGSPAANAPDAGPPQRW   | 4888.29262           | N-Term(Acetyl) | 0                    | 0.002515738      | 4.48195076         | 4      | 1222.828613           | Replicate 1,2,3               |
|                          |       | FALP                                              | 447.25778            |                | 0                    | 0.001676287      | 2.058724958        | 1      | 447.257782            | Replicate 1,2                 |
|                          |       | GSPAAN                                            | 558.25433            | N-Term(Acetyl) | 0                    | 0.00923443       | 2.006696105        | 1      | 558.2543335           | Replicate 1,3                 |
|                          |       | HFDY                                              | 581.23328            |                | 0                    | 0.00043281       | 2.189351395        | 1      | 581.2332764           | Replicate 1,2,3               |
|                          |       | IWTGVIGSPAANAPDAGPPQRWFV                          | 2549.2725            | N-Term(Acetyl) | 0                    | 0.00924534       | 3.811559975        | 3      | 850.4290161           | Replicate 1,2,3               |
|                          |       | LAESIRPLVAPPPAPAPAPAEAPAPAPAGEVAPTPTTPPQR         | 4169.19834           |                | 0                    | 0.0024534        | 3.089836851        | 3      | 1390.404297           | Replicate 2,3                 |
|                          |       | LLSKTTGDPPFPGQPPPVAN                              | 2033.0709            |                | 0                    | 0.00076167       | 3.372875994        | 3      | 678.3618164           | Replicate 1,2,3               |
|                          |       | LTRRKGRLLAALIAAM                                  | 1712.06467           |                | 0                    | 0.0036891        | 3.680278146        | 3      | 571.3597412           | Replicate 1,2,3               |
|                          |       | LVAPP                                             | 593.36566            |                | 0                    | 0.00064035       | 2.053795198        | 1      | 593.3656616           | Replicate 1,2                 |
|                          |       | LVTV                                              | 473.29532            | N-Term(Acetyl) | 0                    | 0.00945298       | 2.155110046        | 1      | 473.2953186           | Replicate 2,3                 |
|                          |       | MGEF                                              | 483.18604            |                | 0                    | 0.00808283       | 2.069672152        | 1      | 483.1860352           | Replicate 1,2                 |
|                          |       | NGVSGS                                            | 520.23779            |                | 0                    | 0.00932659       | 2.043905258        | 1      | 520.237793            | Replicate 1,2                 |
|                          |       | PGTR                                              | 430.24292            |                | 0                    | 0.00903f56       | 2.075941193        | 1      | 430.2429199           | Replicate 1,3                 |
|                          |       | PNAAPPADPNAPPPVIAPNAPQPVRIIDNPVGGFSFALPAGWVE      | 4519.36264           |                | 0                    | 0.00932657       | 3.617172251        | 3      | 1507.125732           | Replicate 1,2,3               |
|                          |       | PPVANDTRIVLGRDLQKLYASAEATDSKAAARLGSDMGEF          | 4234.11875           |                | 0                    | 0.0079299        | 4.532343906        | 3      | 1412.044434           | Replicate 1,2,3               |
|                          |       | QETVSLDANGVSGSASYEYVKFSDPSKPNGQIWTGVIGSPAANAPDAGP | 4936.38979           |                | 0                    | 0.0033507        | 4.991447258        | 4      | 1234.852905           | Replicate 1,2,3               |
|                          |       | STAAAPPATPVAPPPAAAN                               | 1979.01798           | N-Term(Acetyl) | 0                    | 0.0009711        | 4.446426213        | 3      | 660.3441772           | Replicate 1,2,3               |
|                          |       | VAVPATANADPEPAPP                                  | 1516.75925           |                | 0                    | 0.00038475       | 3.782221556        | 3      | 506.2579346           | Replicate 1,2,3               |
|                          |       | WTGV                                              | 462.23315            |                | 0                    | 0.0096359        | 2.038321245        | 1      | 462.2331543           | Replicate 2,3                 |
|                          |       | YASAEATDSKAAARLGSDMGEFYMPYPGTRINQETVS             | 3984.79941           |                | 0                    | 0.0077841        | 3.554167652        | 3      | 1328.937988           | Replicate 1,2,3               |

|                |       |                                                        |            |                                   |   |             |             |    |             |                 |
|----------------|-------|--------------------------------------------------------|------------|-----------------------------------|---|-------------|-------------|----|-------------|-----------------|
| CAA53143.<br>1 | MPT64 | VATAAPKTYCE                                            | 1153.54438 |                                   | 0 | 0.0011484   | 3.600166774 | 3  | 385.1863098 | Replicate 1,2,3 |
|                |       | ADTDPLPVVFPIVQGELSKQ                                   | 2153.14267 |                                   | 0 | 0.00917463  | 4.309296727 | 3  | 718.3857422 | Replicate 1,2,3 |
|                |       | FMLVTAVVLLCCSGVATAAPKTYCEEL                            | 2874.42827 | N-Term(Acetyl)                    | 0 | 0.00334266  | 2.219003096 | 2  | 1437.717773 | Replicate 1,2,3 |
|                |       | FNPG                                                   | 434.20166  |                                   | 0 | 0.00945279  | 2.055417138 | 1  | 434.2016602 | Replicate 1,3   |
|                |       | LNITSATYQSAIPRGTQAVVLKVYQNAGGTHPTTTYKAF                | 4265.23765 |                                   | 0 | 0.0094809   | 8.003737378 | 7  | 610.1830444 | Replicate 1,2,3 |
|                |       | LVTAVVLLCCSGVATAAPKTYCEELKGTDTGQACQIQMSDPAYNINI        | 4903.35708 |                                   | 0 | 0.00947932  | 4.800712347 | 4  | 1226.594727 | Replicate 1,2,3 |
|                |       | QTGQ                                                   | 475.21402  | N-Term(Acetyl)                    | 0 | 0.00969046  | 1.995042706 | 1  | 475.2140198 | Replicate 1,2,3 |
|                |       | RKPITYDTLWQADTDPL                                      | 2033.04563 |                                   | 0 | 0.00022707  | 4.571767759 | 3  | 678.3533936 | Replicate 1,2,3 |
|                |       | TDTGQACQIQMSDPAYNINISLPSYYPDQKSLENYIA                  | 4151.96042 |                                   | 0 | 0.00967356  | 5.217301351 | 3  | 1384.658325 | Replicate 1,2   |
| CCP43682.1     | PstS1 | IDGPAPDGYPIINYEY                                       | 1796.83207 |                                   | 0 | 0.0012195   | 4.431837249 | 3  | 599.6155396 | Replicate 1,2,3 |
|                |       | AAAGCG                                                 | 449.17889  |                                   | 0 | 0.00049302  | 2.372447991 | 1  | 449.178894  | Replicate 1,2   |
|                |       | AFHERYPNVTTITAQGTGSGAGIAQAAAGTVNIGASDAYLSEGMAAHK<br>GL | 4917.42148 |                                   | 0 | 0.00974257  | 4.187691104 | 3  | 1639.812012 | Replicate 1,2,3 |
|                |       | AIVN                                                   | 416.24872  |                                   | 0 | 0.00243     | 2.163995856 | 1  | 416.2487183 | Replicate 1,3   |
|                |       | ALGENGNMVTGCAETPGCVAYIGISFLDQASQRGLGEAQLGNSSGN         | 4687.18813 | M10(Oxidation)                    | 0 | 0.00967459  | 5.504872698 | 4  | 1172.55249  | Replicate 1,2,3 |
|                |       | FGTT                                                   | 425.20187  |                                   | 0 | 0.0032517   | 2.076373297 | 1  | 425.2018738 | Replicate 1,2,3 |
|                |       | FGTTVDFPAVPGALGENGNMVTGCA                              | 2539.13834 |                                   | 0 | 0.0064476   | 5.346179008 | 3  | 847.0509644 | Replicate 1,2,3 |
|                |       | FHER                                                   | 588.28668  |                                   | 0 | 0.007875    | 2.022431257 | 1  | 588.2866821 | Replicate 2,3   |
|                |       | GASDAYLSEGMAAHK                                        | 1622.72551 |                                   | 0 | 0.0076824   | 4.453323483 | 2  | 811.866394  | Replicate 1,2,3 |
|                |       | GVNL                                                   | 444.24377  | N-Term(Acetyl)                    | 0 | 0.007923626 | 1.950363649 | 1  | 444.2437744 | Replicate 1,2   |
|                |       | KIRLHT                                                 | 767.48839  |                                   | 0 | 0.00973452  | 2.028176047 | 2  | 384.2478333 | Replicate 1,2,3 |
|                |       | KLNG                                                   | 431.2641   |                                   | 0 | 0.00015939  | 1.980164593 | 1  | 431.2640991 | Replicate 1,3   |
|                |       | KSPGFGTTVDFP                                           | 1252.6092  |                                   | 0 | 0.00051327  | 5.124933398 | 3  | 418.2079163 | Replicate 1,2,3 |
|                |       | LHTLLA                                                 | 667.41815  |                                   | 0 | 0.00059355  | 2.183272952 | 1  | 667.4181519 | Replicate 1,3   |
|                |       | LHWAITDGNKASFLDQVHFQ                                   | 2327.14176 |                                   | 0 | 0.00065844  | 4.324119502 | 3  | 776.385437  | Replicate 1,2,3 |
|                |       | LLLAAAGCGS                                             | 875.45879  |                                   | 0 | 0.002453432 | 3.205284667 | 2  | 438.2330322 | Replicate 1,2,3 |
|                |       | LNGK                                                   | 431.26471  |                                   | 0 | 0.00974636  | 2.015185201 | 1  | 431.2647095 | Replicate 2,3   |
|                |       | NGGMVTGCAETPGCVAYIGISFLDQASQRGLGEAQLGNSS               | 3958.86457 |                                   | 0 | 0.00974624  | 7.340895617 | 5  | 792.5787354 | Replicate 1,2,3 |
|                |       | PGFGTTVDFPAVPGALGENGNMVTGCAETPGCVAYIGISFLDQASQR        | 4887.22338 | N-Term(Acetyl);<br>M24(Oxidation) | 0 | 0.00978532  | 9.658131113 | 11 | 445.2087402 | Replicate 1,2,3 |
|                |       | PLLLAAAGCGSKPPSGPETGAGAGTVATTPASSPVT                   | 3278.65639 |                                   | 0 | 0.00959835  | 4.758069664 | 4  | 820.4195557 | Replicate 1,2   |

|            |       |                                                   |            |  |   |             |             |   |             |                |
|------------|-------|---------------------------------------------------|------------|--|---|-------------|-------------|---|-------------|----------------|
|            |       | PLPPAVVKLSDALI                                    | 1432.86737 |  | 0 | 0.008762459 | 4.412128472 | 3 | 478.2939758 | Replicate2,3   |
|            |       | TTPASSPVTLAETGSTALLYPLFNLWGPAFHERYPNVTITAQGTGSGAG | 4948.44204 |  | 0 | 0.00954798  | 5.009198439 | 4 | 1237.865967 | Replicate1,2,3 |
|            |       | WAIT                                              | 490.26349  |  | 0 | 0.00956246  | 2.020125601 | 1 | 490.2634888 | Replicate2,3   |
|            |       | WGPA                                              | 430.20688  |  | 0 | 0.007474354 | 2.193955207 | 1 | 430.2068787 | Replicate2,3   |
| CCP46703.1 | CFP10 | QWRGAAGTAAQAAVVRFEAANKQ                           | 2529.31968 |  | 0 | 0.00945228  | 4.399345472 | 3 | 843.7780762 | Replicate1,2,3 |
|            |       | DAATLAQEAGNFERISGDLKTQIDQVESTAGSLQGQWRGAAGTA      | 4519.25278 |  | 0 | 0.0080244   | 5.441708852 | 3 | 1507.089111 | Replicate1,2,3 |
|            |       | GDLKTQIDQVESTAGSLQGQWR                            | 2417.1868  |  | 0 | 0.00079389  | 4.54818325  | 3 | 806.4004517 | Replicate1,3   |
|            |       | GNFERISGDLK                                       | 1235.63568 |  | 0 | 0.00017415  | 5.059049198 | 3 | 412.5500793 | Replicate1,2,3 |
|            |       | GTAAQ                                             | 447.22223  |  | 0 | 0.00066951  | 2.086983728 | 1 | 447.222229  | Replicate1,2   |

<sup>a</sup> Peptide sequence: identified peptide sequences for each protein; <sup>b</sup> MH+[Da]: mass-to-charge ratio (m/z) of the peptide with z=1. <sup>c</sup> q-value: the minimal false discovery rate at which the identification is considered correct. <sup>d</sup> PEP: the probability that the observed PSM is incorrect; <sup>e</sup> Xcorr: cross-correlation value; <sup>f</sup> m/z: mass-to-charge ratio. <sup>g</sup> The replicate numbers of identified peptide sequences for the protein in LC-MS/MS analysis, which all samples were performed in three replicates.

Table S2. Biochemical clinical factors of enrolled pulmonary TB patients and non-TB patients

| Biochemical clinical factors | Samples, No.                 |                        | <i>P</i> |
|------------------------------|------------------------------|------------------------|----------|
|                              | Pulmonary TB ( <i>n</i> =43) | Non-TB ( <i>n</i> =30) |          |
| ALT (U/L)                    | 17.0±16.7                    | 16.9±6.6               | 0.031    |
| AST (U/L)                    | 26.7±21.6                    | 19.5±5.7               | 0.752    |
| ALP (U/L)                    | 89.0±25.6                    | 76.4±24.0              | 0.038    |
| TP (g/L)                     | 63.8±4.9                     | 63.2±13.6              | 0.927    |
| ALB (g/L)                    | 33.8±4.8                     | 38.7±9.9               | 0.000    |
| TBIL (μmol/L)                | 13.3±9.0                     | 14.8±8.2               | 0.460    |
| DBIL (μmol/L)                | 4.0±3.7                      | 2.8±1.0                | 0.049    |
| IBIL (μmol/L)                | 9.2±5.7                      | 10.1±4.4               | 0.493    |
| GGT (U/L)                    | 48.9±77.6                    | 24.1±19.9              | 0.014    |
| ADA (U/L)                    | 11.6±5.6                     | 11.5±19.5              | 0.005    |
| GLU (mmol/L)                 | 5.7±2.4                      | 5.5±1.9                | 0.752    |
| BUN (mmol/L)                 | 4.9±2.9                      | 5.1±1.1                | 0.039    |
| CREA (μmol/L)                | 67.0±22.3                    | 61.1±15.7              | 0.523    |
| UA (μmol/L)                  | 350.8±186.5                  | 311.4±91.3             | 0.922    |
| K <sup>+</sup> (mmol/L)      | 4.0±0.5                      | 4.5±1.9                | 0.079    |
| Na <sup>+</sup> (mmol/L)     | 139.6±4.0                    | 135.5±25.7             | 0.098    |
| Cl <sup>-</sup> (mmol/L)     | 102.5±4.7                    | 105.7±7.2              | 0.052    |
| LDH (U/L)                    | 169.3±47.1                   | 227.7±212.9            | 0.073    |
| CRP (mg/L)                   | 35.9±38.5                    | 6.4±11.6               | 0.000    |

ALT, alanine aminotransferase; AST, aspartate aminotransferase; ALP, alkaline phosphatase; TP, total protein; ALB, Albumin; TBIL, total bilirubin; DBIL, direct bilirubin; IBIL, indirect bilirubin; GGT, gamma-glutamyltransferase; ADA, adenosine deaminase; GLU, glucose; BUN, blood urea nitrogen; CREA, creatinine; UA, uric acid; K<sup>+</sup>, potassium; Na<sup>+</sup>, sodium; Cl<sup>-</sup>, chloride; LDH, lactate dehydrogenase; CRP, C-reactive protein.

Table S3. Blood cytology index of enrolled pulmonary TB patients and non-TB patients

| Blood cytology index      | Samples, No.                 |                        | <i>P</i> |
|---------------------------|------------------------------|------------------------|----------|
|                           | Pulmonary TB ( <i>n</i> =43) | Non-TB ( <i>n</i> =30) |          |
| WBC (10 <sup>9</sup> /L)  | 6.4±2.1                      | 6.5±1.9                | 0.809    |
| RBC (10 <sup>12</sup> /L) | 4.0±0.8                      | 4.3±0.5                | 0.100    |
| HGB (g/L)                 | 120.8±21.7                   | 133.3±13.7             | 0.007    |
| PLT (10 <sup>9</sup> /L)  | 253.2±93.2                   | 249.8±78.2             | 0.869    |
| LY (10 <sup>9</sup> /L)   | 1.3±0.5                      | 1.8±0.6                | 0.000    |
| MONO (10 <sup>9</sup> /L) | 0.5±0.2                      | 0.4±0.2                | 0.215    |
| NEUT (10 <sup>9</sup> /L) | 4.4±2.1                      | 4.0±1.6                | 0.302    |
| ESO (10 <sup>9</sup> /L)  | 0.1±0.1                      | 0.2±0.1                | 0.190    |
| BASO (10 <sup>9</sup> /L) | 0.03±0.02                    | 0.04±0.02              | 0.480    |
| LY% (%)                   | 21.5±10.1                    | 29.8±10.2              | 0.001    |
| MONO% (%)                 | 7.8±1.8                      | 6.8±2.1                | 0.033    |
| NEUT% (%)                 | 67.8±10.8                    | 59.9±10.8              | 0.003    |
| ESO% (%)                  | 2.4±1.8                      | 3.0±2.3                | 0.264    |
| BASO% (%)                 | 0.5±0.3                      | 0.6±0.3                | 0.487    |

WBC, white blood cell count; RBC, red blood cell count; HGB, hemoglobin concentration; PLT, platelet count; LY, lymphocyte count; MONO, monocyte count; NEUT, neutrophil count; ESO, eosinophil count; BASO, basophil count; LY%, lymphocyte percentage; MONO%, monocyte percentage; NEUT%, neutrophil percentage; ESO%, eosinophil percentage; BASO%, basophil percentage.

Table S4. The characteristics of five candidate peptides

| Name    | Peptide sequence  | Length <sup>a</sup> | Antigenicity | Surface <sup>b</sup> | Hydrophilicity | Disordered Score <sup>c</sup> |
|---------|-------------------|---------------------|--------------|----------------------|----------------|-------------------------------|
| MPT32-2 | SKTTGDPPFPGQ      | 12                  | 1.71         | 1.51                 | 0.18           | 0.5336                        |
| MPT64-2 | RKPITYDTLWQADTDPL | 17                  | 1.76         | 0.88                 | 0.1            | 0.3941                        |
| CFP10-2 | GNFERISGDLK       | 11                  | 1.85         | 0.95                 | 0.5            | 0.406                         |
| PstS1-2 | GASDAYLSEGDMAAHK  | 16                  | 2.88         | 1                    | 0.28           | 0.3767                        |
| PstS1-3 | KSPGFGTTVDFP      | 12                  | 0.66         | 0.76                 | -0.17          | 0.5022                        |

<sup>a</sup>: numbers of amino acids of each peptide; <sup>b</sup>: scores for probability of exposure on the protein surface;

<sup>c</sup>: scores for protein secondary structure uncertainty.

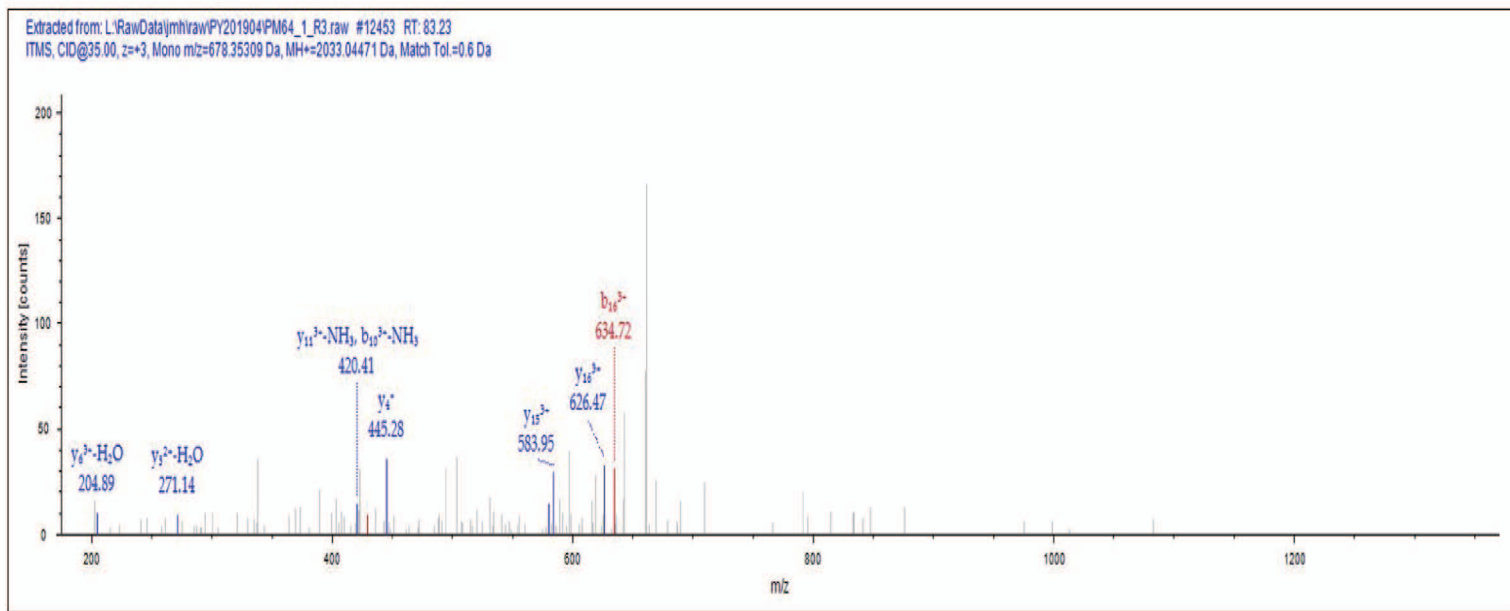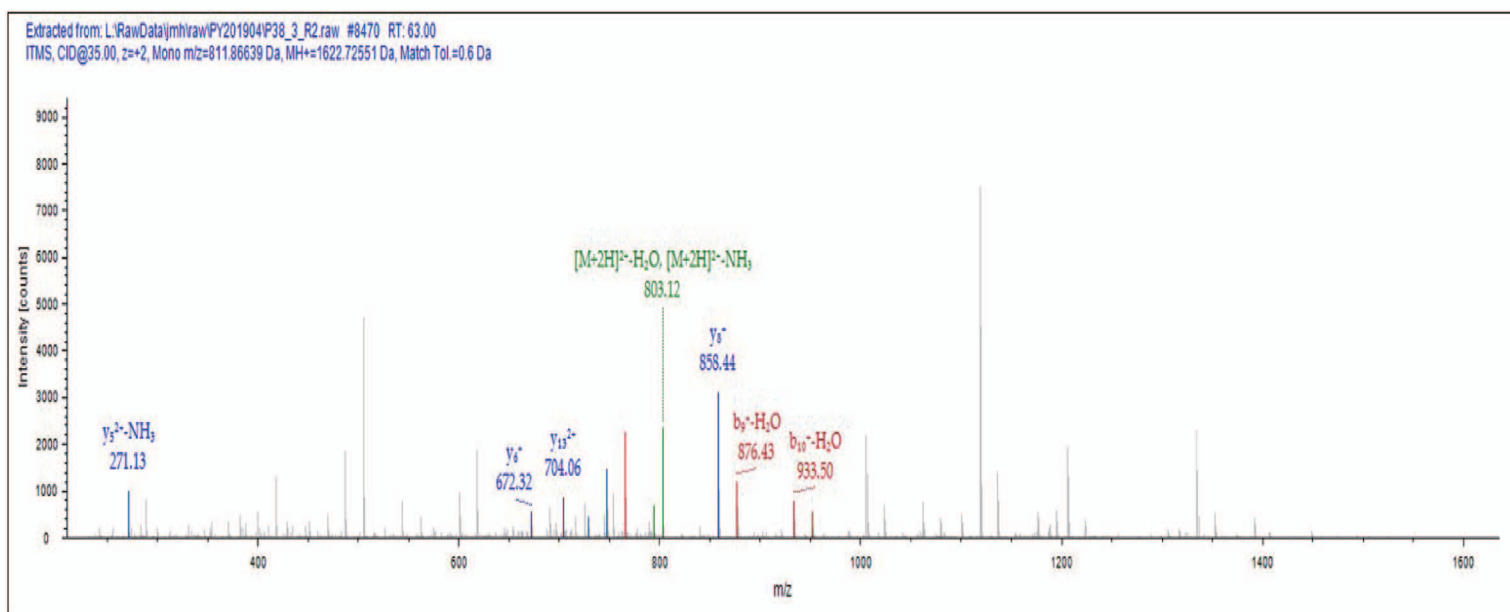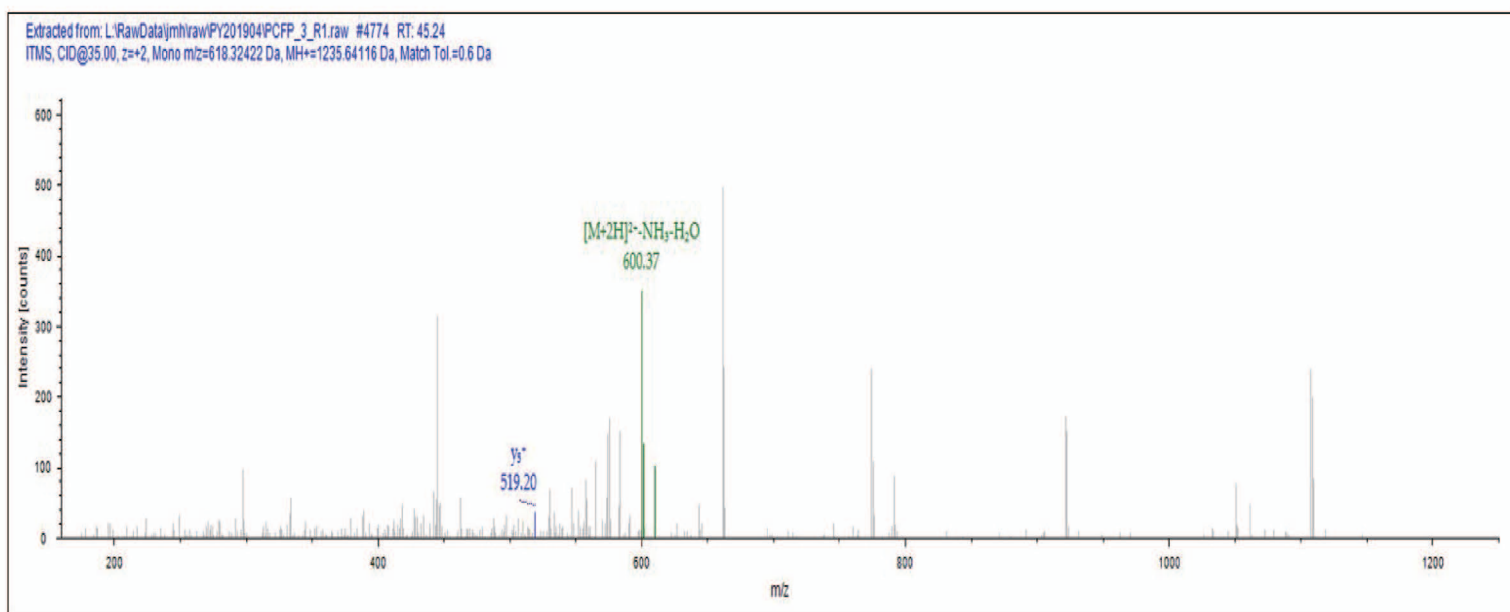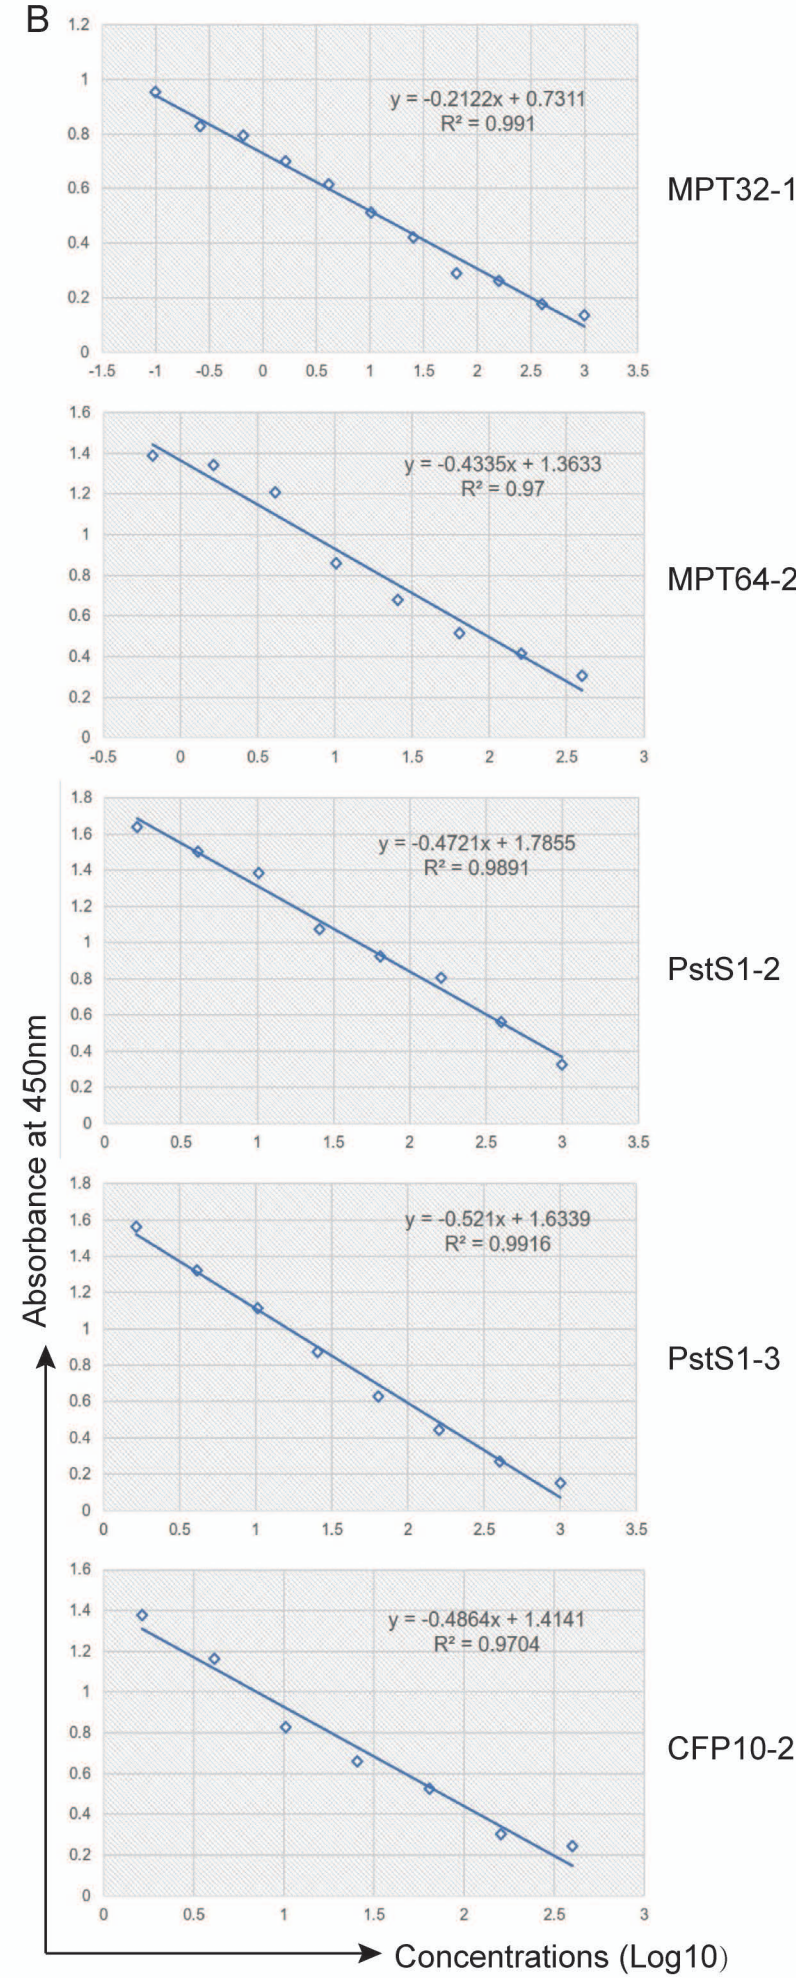

Figure S1. Representative MS spectra (A) and standard calibration curves for selected peptides (B).
